# Supplementary material for: Bacterial lipopolysaccharide induces settlement and metamorphosis in a marine larva
Source: bioRxiv or medRxiv preprint supplement (doi:10.1101/851519), 2022-01-18
Supplement: Supplementary file [file media-1.pdf]

# PNAS

[www.pnas.org](http://www.pnas.org)

Supplementary Information for

Bacterial lipopolysaccharide induces settlement and metamorphosis in a marine larva.

Marnie L Freckelton, Brian T. Nedved, You-Sheng Cai, Shugeng Cao, Helen Turano, Rosanna A. Alegado and Michael G. Hadfield\*

\*correspondence: Michael G. Hadfield  
Email: [hadfield@hawaii.edu](mailto:hadfield@hawaii.edu)

**This PDF file includes:**

Supplementary text  
Figures S1 to S5  
Tables S1 to S3  
SI References

## Supplementary Information Text

### Small molecule analysis of cell pellets from *C. lytica*:

Cell pellets of *C. lytica* were extracted with MeOH twice followed by repeated extraction with MeOH: DCM (1:1). The MeOH: DCM extract was subjected to semi-preparative reverse chromatography HPLC (C18, ACN: 10-25%, 20 mins; 25-40%, 10 mins; 40-100%, 20 mins; 100% 10 mins). Fractions were collected every minute, dried and resuspended at 20 mg/ml and tested for metamorphic activity at a concentration of (10 µg/ml). Activity was detected in fraction 7 and fraction 29; fraction CLP-29 did not contain enough material or any indicative absorbance to pursue further.

Semi-preparative reverse chromatography of CLP7 (C18; MeOH 10%, 30 mins) yielded activity in the 2<sup>nd</sup> and 4<sup>th</sup> fractions (Fig S2). LC-Mass spectrometry and <sup>1</sup>H NMR spectroscopy were consistent with the presence of phenylalanine and adenosine (Fig S3). To confirm the activity and further elucidate the stereochemistry, both isolated and commercial versions of adenosine (Sigma-Aldrich) and phenylalanine (D and L; Sigma-Aldrich) were tested for metamorphic induction (Fig S4 and S5). Additional commercially available compounds (thymidine, leucine (D and L) and niacin) were also tested (Fig S5).

### Small molecule analysis of cell-free supernatant from *C. lytica* containing OMVs:

Conditioned media of *C. lytica* cultures (3.7 L) were extracted with ethyl acetate (EtOAc) and dried (363 mg). The EtOAc extract was subjected to semi-preparative reverse chromatography HPLC (C18, ACN: 10-25%, 20 mins; 25-40%, 10 mins; 40-100%, 20 mins; 100% 10 mins). Fractions were collected every minute, dried and resuspended at 20 mg/ml ethanol and tested for metamorphic activity at a concentration of (10 µg/ml). Activity was identified in the 25<sup>th</sup> and 26<sup>th</sup> fractions which were combined. LC-MS revealed a compound consistent with the presence of a diketopiperazine of phenylalanine and proline. Isolated and commercial versions of this compound were subjected to metamorphosis assay as previously described (Fig S6).

### **Genome Mining for Secondary Metabolites**

Analysis of the genome of *C. lytica* for the presence of secondary metabolite biosynthesis gene clusters revealed a single contig (*ctg1\_392*) located between 455,027 - 455,863. A protein blast of this contig, identified it as a phytoene synthase (Table S1). The Minimum Information about a Biosynthetic Gene cluster (MIBiG) failed to match any enzymes with greater than 50% sequence identity (Table S2). Similar low matches were generated using NaPDos (Table S3).

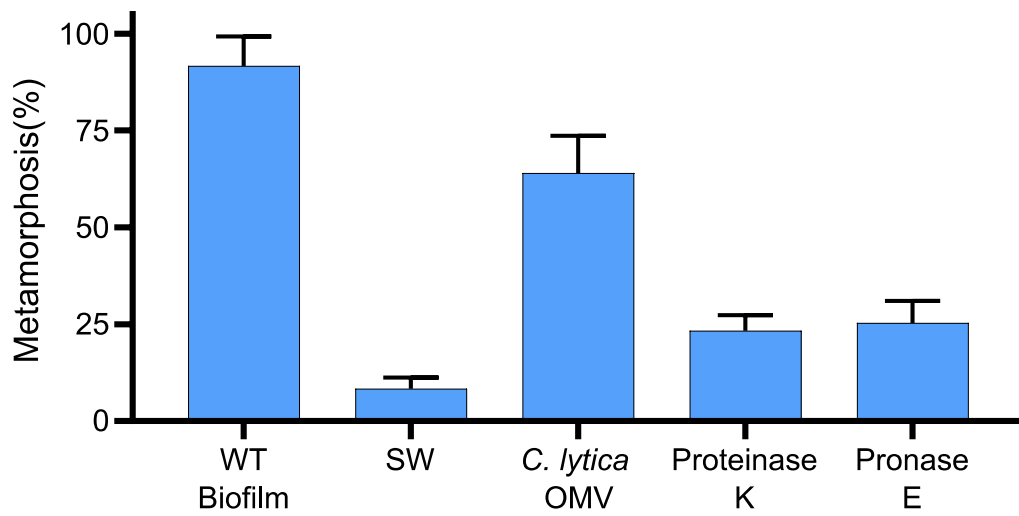

**Fig. S1.** Proteases induce metamorphosis in larvae of *C. lytica*. Larvae of *H. elegans* were exposed to either Proteinase K (5 U) or Pronase E (5 U). Metamorphosis was counted after 24 h exposure. Filtered seawater (SW) served as a negative control, and a multispecies biofilm and untreated OMVs were used as positive controls.

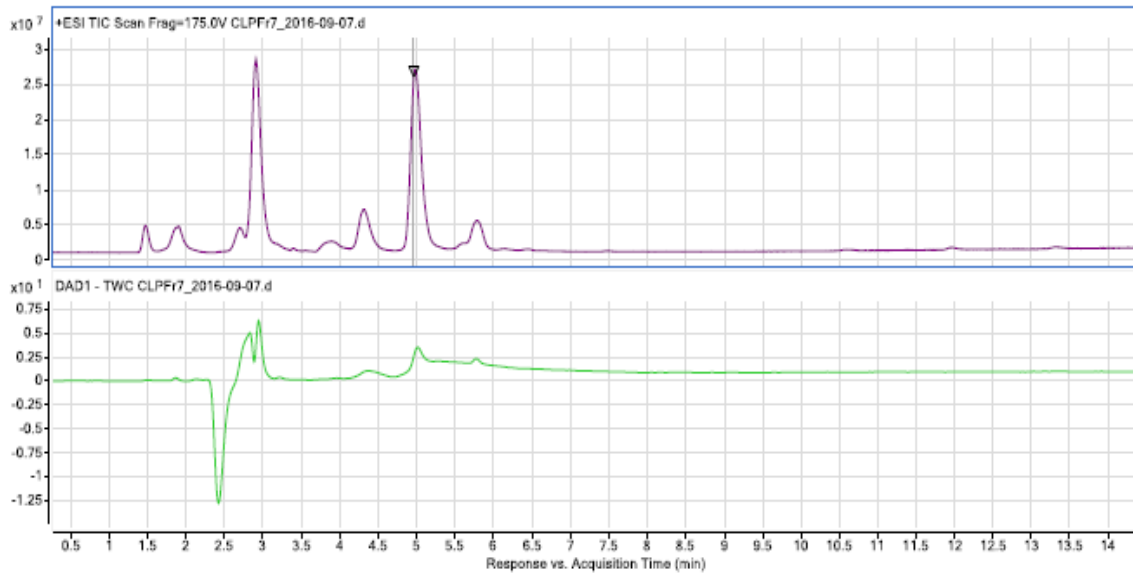

**Fig. S2.** Positive mode LCMS data from most active cell pellet fraction (CLP7) yielded  $m/z$  of 123.0459 and 268.1043. Ions were detected within a mass range  $m/z$  100-1100.

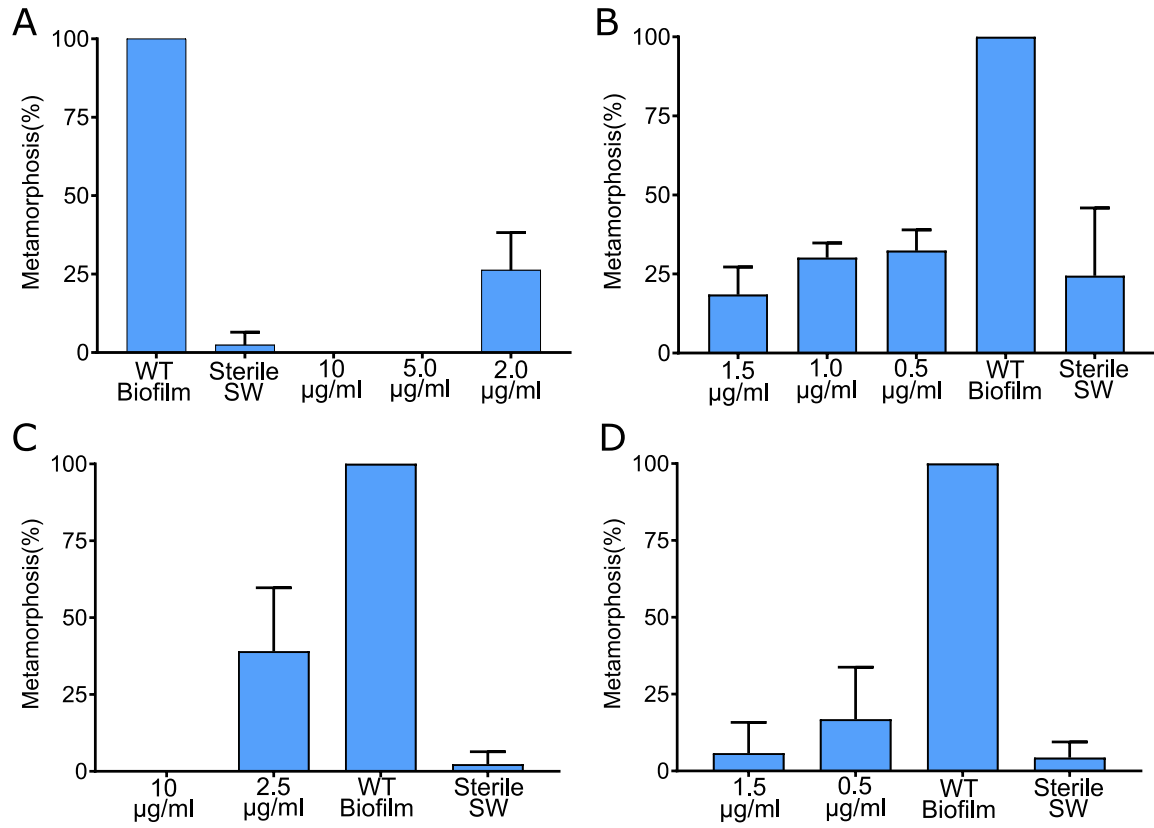

**Fig. S3.** Metamorphosis of larvae of *H. elegans* when exposed to isolated A and B) adenosine and C and D) phenylalanine from Fraction 7 of the cell pellet for 24 hrs. Positive Control: Wild Type (WT) Biofilm. Negative Control: Sterile Seawater (SW).

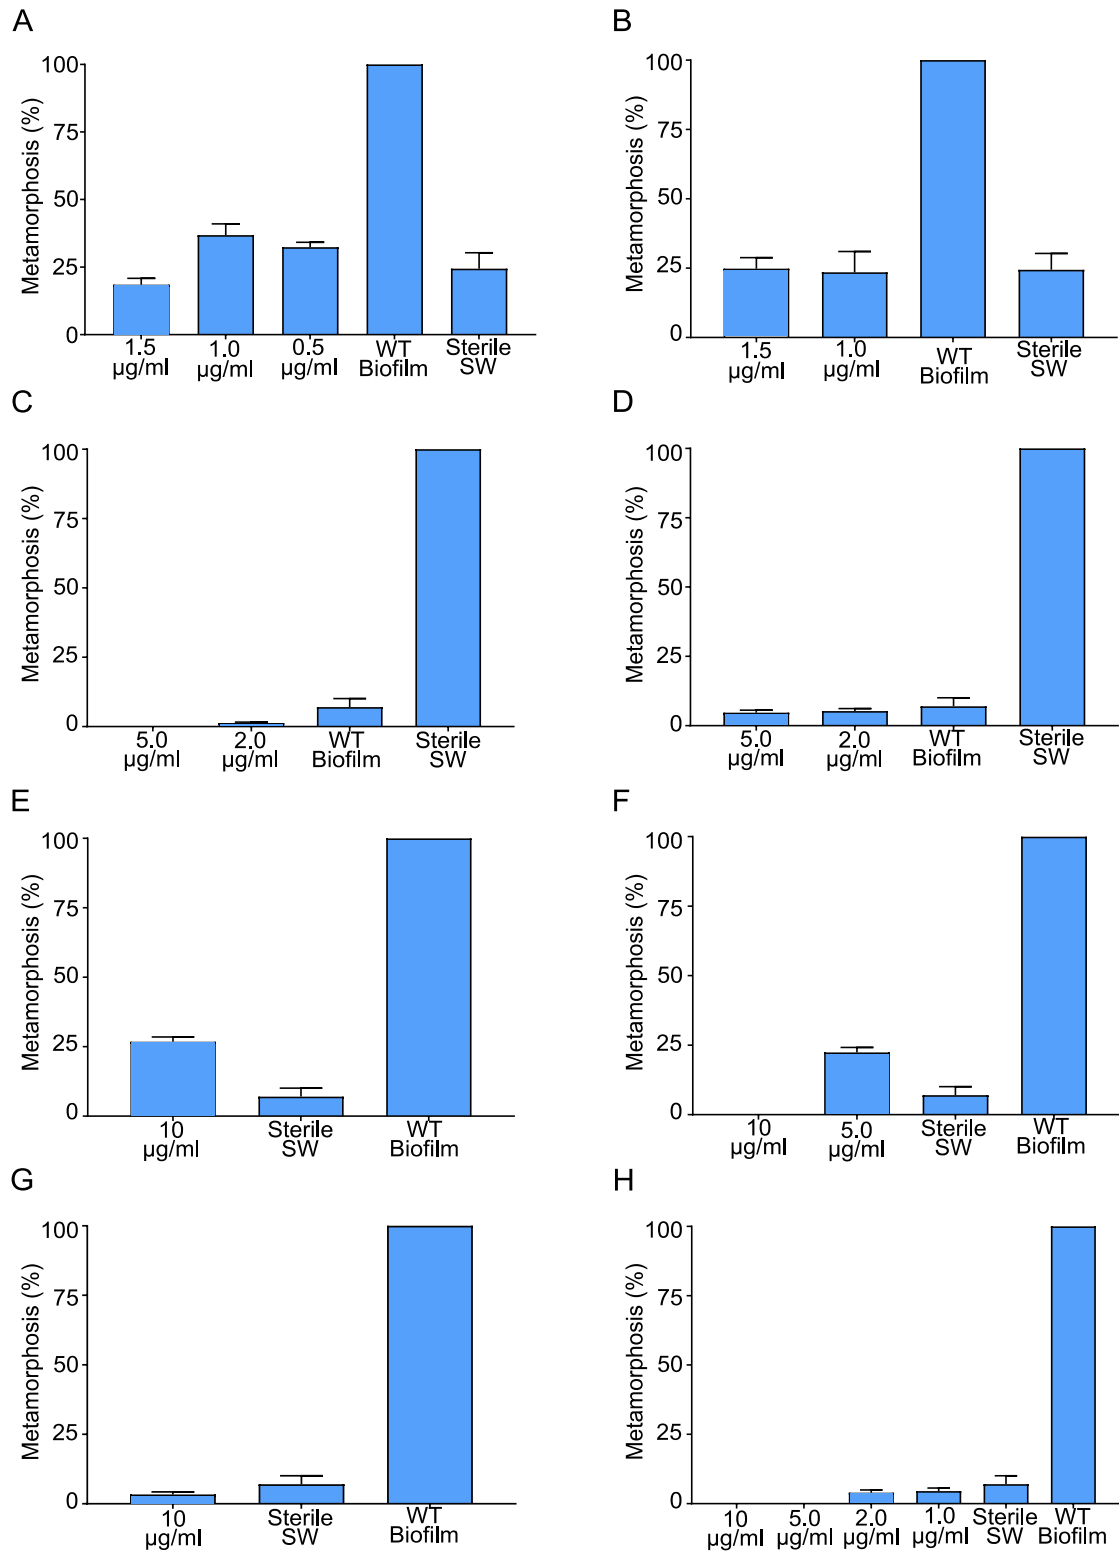

**Fig S4.** Metamorphosis of larvae of *H. elegans* when exposed to commercial versions of compounds detected in fraction 7 for 24 hrs. A) Adenosine; B) DL-Phenylalanine; C) L-Phenylalanine; D) D-Phenylalanine; E) Niacin; F) Thymidine; G) L-Leucine; H) D-Leucine. Positive Control: Wild Type (WT) Biofilm. Negative Control: Sterile Seawater (SW).

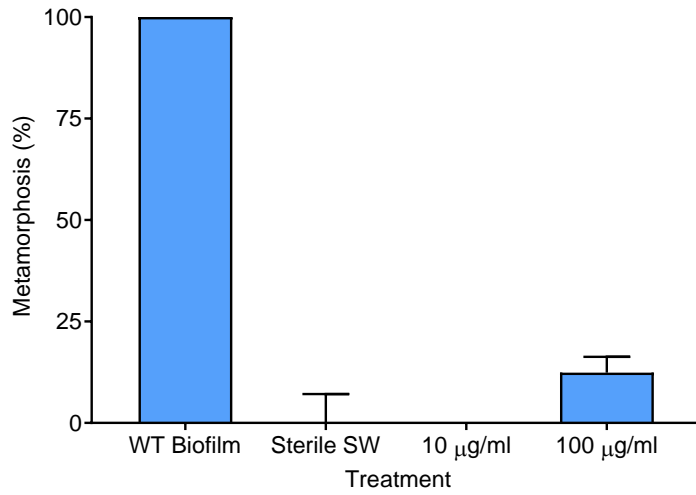

**Fig S5.** Metamorphosis of larvae of *H. elegans* when exposed to commercial version of the diketopiperazine of phenylalanine and proline detected in fraction 25 of the supernatant from a *C. lytica* culture for 24 hrs. Positive Control: Wild Type (WT) Biofilm. Negative Control: Sterile Seawater (SW).



**Table S1.** NCBI BlastP on ctg1\_392 from genome of *C. lytica* generated by AntiSMASH (1)

| Accession      | Description                                         | Max Score | Total Score | Query Cover | E value | % Ident |
|----------------|-----------------------------------------------------|-----------|-------------|-------------|---------|---------|
| WP_013620042.1 | phytoene synthase<br>[ <i>Cellulophaga lytica</i> ] | 563       | 563         | 100%        | 0.0     | 100.00% |

**Table S2.** Minimum Information about a Biosynthetic Gene cluster (MIBiG) search results from genome of *C. lytica* generated by AntiSMASH (1)

| MIBiG Protein | Description       | MIBiG Cluster | MiBiG Product      | % ID | % Coverage | BLAST Score | E-value |
|---------------|-------------------|---------------|--------------------|------|------------|-------------|---------|
| ABB88949.1    | CrtB              | BGC0000650    | terpene            | 50.0 | 99.6       | 255.0       | 1.2e-67 |
| AAK64298.1    | Phytoene synthase | BGC0000637    | terpene            | 37.0 | 100.4      | 168.0       | 1.5e-41 |
| ABD24399.1    | Phytoene synthase | BGC0000644    | terpene            | 33.0 | 97.1       | 155.0       | 9.9e-38 |
| AAF65581.1    | Phytoene synthase | BGC0000636    | terpene            | 34.0 | 102.5      | 134.0       | 2.4e-31 |
| ABP56869.1    | Phytoene synthase | BGC0001087    | saccharide-terpene | 25.0 | 89.9       | 80.0        | 5.3e-15 |

**Table S3:** Polyketide Synthase (KS) domains within the genome of *C. lytica* generated by NaPDos (2). Search was run with relaxed parameters.

|     | Query ID                | Database match ID  | % ident. | Align length | e-val              | Pathway product                  |
|-----|-------------------------|--------------------|----------|--------------|--------------------|----------------------------------|
| KS2 | CP009239.1_3_157_15_425 | FabF_Bacillus_FAS  | 55       | 409          | 5e <sup>-112</sup> | <u>fatty acid synthesis</u>      |
| KS1 | CP009239.1_4_290_11_391 | FabF_Bacillus_FAS  | 26       | 414          | 8e <sup>-24</sup>  | <u>fatty acid synthesis</u>      |
| KS3 | CP009239.1_6_112_8_221  | Myca_YP880565_1KSB | 30       | 131          | 2e <sup>-06</sup>  | <u>mycocerosic acid synthase</u> |

## SI References

1. M. H. Medema, *et al.*, AntiSMASH: Rapid identification, annotation and analysis of secondary metabolite biosynthesis gene clusters in bacterial and fungal genome sequences. *Nucleic Acids Res.* **39**, W339–W346 (2011).
2. N. Ziemert, *et al.*, The natural product domain seeker NaPDoS: A phylogeny based bioinformatic tool to classify secondary metabolite gene diversity. *PLoS One* **7**, e34064 (2012).
